# Supplementary material for: Chitotriosidase 1 in the cerebrospinal fluid as a putative biomarker for HTLV-1-associated myelopathy/tropical spastic paraparesis (HAM/TSP) progression
Source: Front Immunol. 2022 Aug 16;13:949516. doi: 10.3389/fimmu.2022.949516 (PMC9424492; doi:10.3389/fimmu.2022.949516)
Supplement: Supplementary file 8 [file Table_5.xlsx]

## Sheet: Correlation analysis
Supplementary Table 5. Correlation of CHIT1 and sVCAM-1 levels in the cerebrospinal fluid with biomarkers of neuroinflammation and neuronal damagein HAM/TSP patients.
Spearman’s rank correlation test was performed between the levels of CHIT1 and sVCAM-1 in the cerebrospinal fluid (CSF) of HAM/TSP patients and the CSF levels of neopterin, Tau protein, neurofilament light chain protein (NfL), phosphorylated neurofilament heavy chain (pNfH) protein, cellular prion protein (PrPc), proinflammatory chemokines (CXCL8, CXCL10, CCL17, CCL2, CCL3, CXCL5, CXCL1, CXCL11, …
CSF Markers	CSF CHIT1 Rho	CSF CHIT1 p-value	CSF CHIT1 AC Rho	CSF CHIT1 AC p-value	CSF CHIT1 HAM Rho	CSF CHIT1 HAM p-value	CSF sVCAM-1 Rho	CSF sVCAM-1 p-value	CSF sVCAM-1 AC Rho	CSF sVCAM-1 AC p-value	CSF sVCAM-1 HAM Rho	CSF VCAM-1 HAM p-value
Neopterin	0.5628	0.0008	-0.4615	0.1338	0.6026	0.0046	0.4438	0.0109	-0.5429	0.0682	0.5654	0.0106
Tau	0.0064	0.9726	0.2657	0.404	0.2662	0.2424	0.0161	0.9302	-0.1121	0.7287	0.2812	0.2289
NfL	-0.0869	0.6294	0.0559	0.869	-0.2182	0.3404	0.1749	0.3384	0.2417	0.4492	0.1774	0.4525
pNfH	0.4729	0.0059	0.5455	0.0707	0.6273	0.0029	0.4337	0.0131	0.2277	0.4767	0.5624	0.0111
PrPc	-0.1482	0.4106	-0.7183	0.0085	-0.3262	0.149	-0.0186	0.9194	-0.4515	0.1406	0.0135	0.9548
CXCL8	0.4626	0.0067	0.1684	0.6008	0.3986	0.0735	0.2885	0.1093	-0.2865	0.3667	0.4842	0.0305
CXCL10	0.7005	0	-0.042	0.9037	0.5481	0.0112	0.4189	0.017	-0.0806	0.8035	0.2677	0.2528
CCL17	0.565	0.0006	-0.1587	0.6222	0.4052	0.0684	0.4109	0.0195	0.1272	0.6936	0.2411	0.3059
CCL2	0.2856	0.1071	-0.028	0.9387	0.3481	0.1225	0.4145	0.0184	0.0175	0.9569	0.4797	0.0339
CCL3	0.2853	0.1076	0.063	0.8457	0.0858	0.7115	0.5561	0.0009	-0.0526	0.871	0.6654	0.0014
CXCL5	0.372	0.033	-0.3678	0.2395	0.4394	0.0463	0.2219	0.2222	-0.5123	0.0886	0.3845	0.0942
CXCL1	0.2713	0.1268	0.0234	0.9423	0.2784	0.2217	0.5513	0.0011	0.3092	0.328	0.6076	0.0045
CXCL11	0.6031	0.0002	-0.1538	0.6351	0.4356	0.0484	0.5002	0.0036	0.1296	0.6881	0.3983	0.0819
CCL4	0.5681	0.0006	0.2039	0.5251	0.3562	0.113	0.5235	0.0021	0.0475	0.8834	0.4928	0.0273
Glucose	0.1176	0.5144	0.0912	0.778	0.2492	0.276	-0.2259	0.2138	-0.2337	0.4647	-0.1996	0.3988
Protein Count	0.1559	0.4192	0.3357	0.2867	0.2428	0.3477	-0.0126	0.9493	0.0385	0.9054	0.2929	0.271
Cell Count	0.3239	0.066	0.0751	0.8166	0.1294	0.5761	0.3502	0.0494	0.2194	0.4934	0.2133	0.3666
